# Supplementary material for: Transcriptomic and Metabolic Profiling of High-Temperature Treated Storage Roots Reveals the Mechanism of Saccharification in Sweetpotato (Ipomoea batatas (L.) Lam.)
Source: MDPI journal article supplement (doi:10.3390/ijms22136641), 2021-06-22
Supplement: s1 [file s1]

**A**

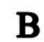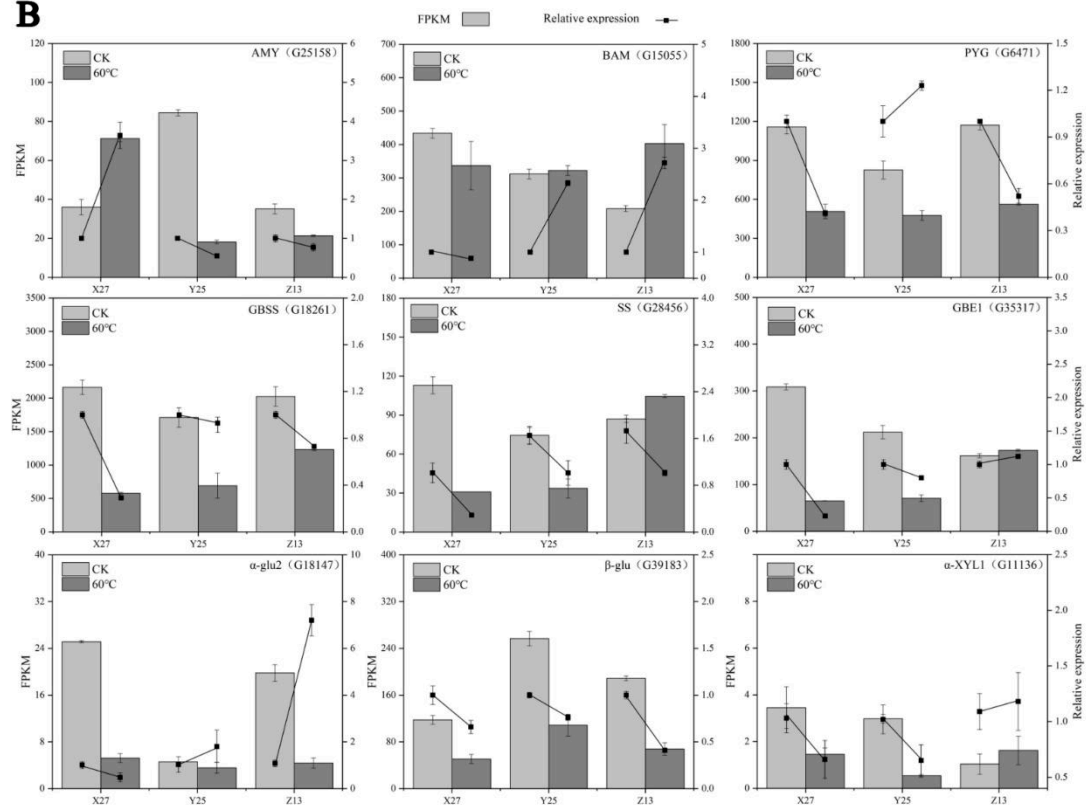

Fig. S1 qRT-PCR validation of genes associated with maltose metabolism in Sweetpotato samples at different growth period. Nine differentially expressed genes were selected for qRT-PCR analysis at different stages, including *AMY*, *BAM*, *PYG*, *GBSS*, *SS*, *GBE1*, *α-glu2*, *β-glu* and *α-XYLI*. Figure A and B are the data of sample determination at the growth period of 90 days(S1) and 130 days(S2), respectively. The qRT-PCR expression levels were calculated as a ratio relative to the level of expression in three samples CK samples of different growth period, which was set as 1. All qRT-PCR calculations of expression were normalized using the Ct value corresponding to *IbARF* gene. Values are the means±SE of three biological replicates.



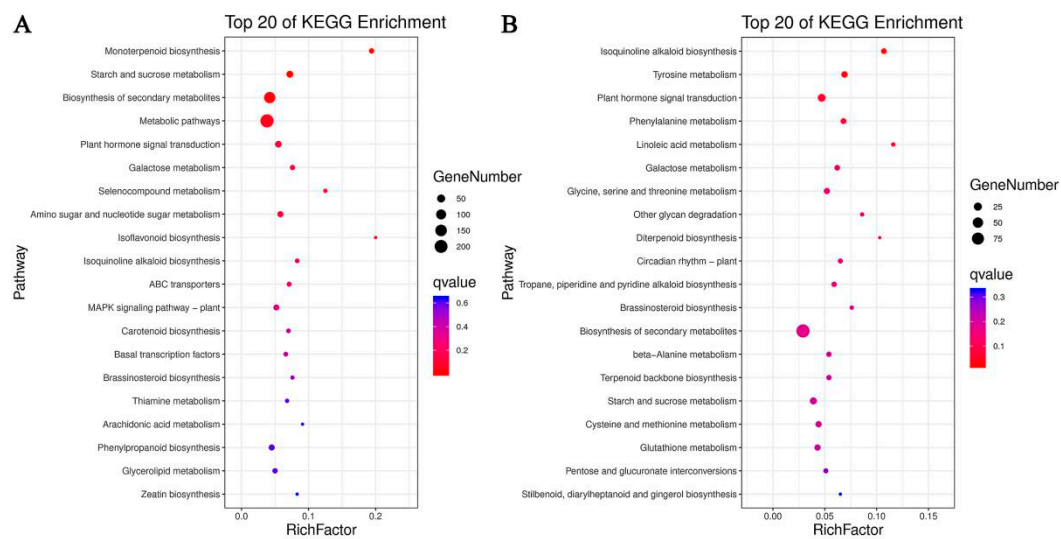

Fig. S3 KEGG pathway analysis of samples from S1 and S2 growth stages A&B. The statistics of the number of DEGs in different metabolic pathways were obtained by KEGG enrichment analysis in sweetpotato for S1 and S2, respectively.

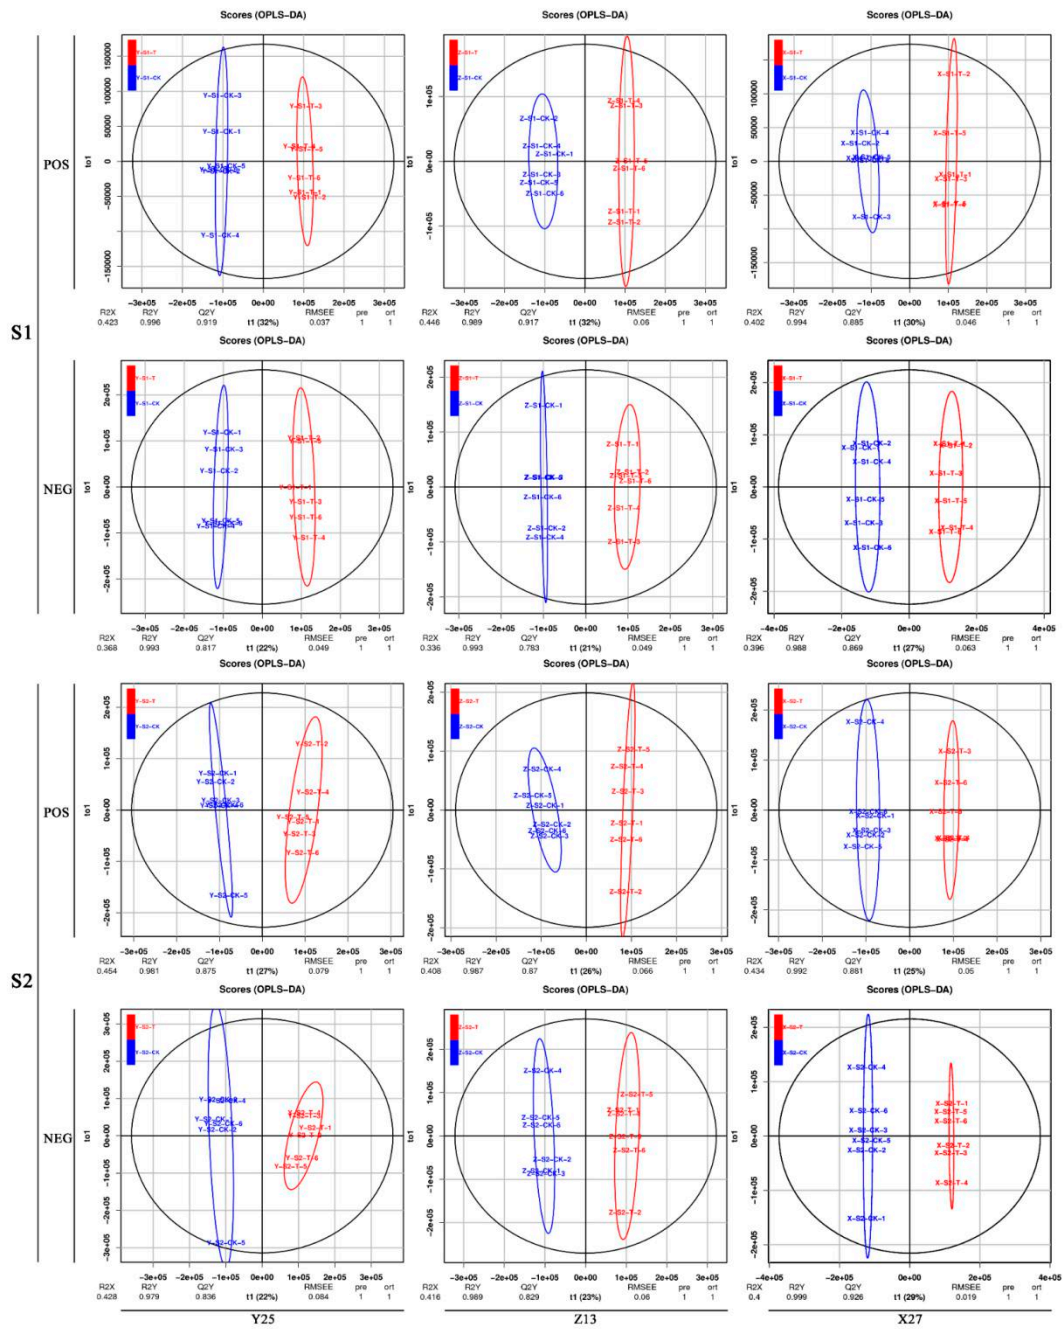

Fig. S4 (O)PLS-DA score plot of sweetpotato samples at different growth period. R2X, R2Y and Q2 are used to evaluate the (O) PLS-DA evaluation model. The closer the three indexes are to 1, the more stable and reliable the model is. When  $Q2 > 0.5$ , the prediction ability of the model is better, and when  $Q2 > 0.9$ , the prediction ability of the model is excellent.

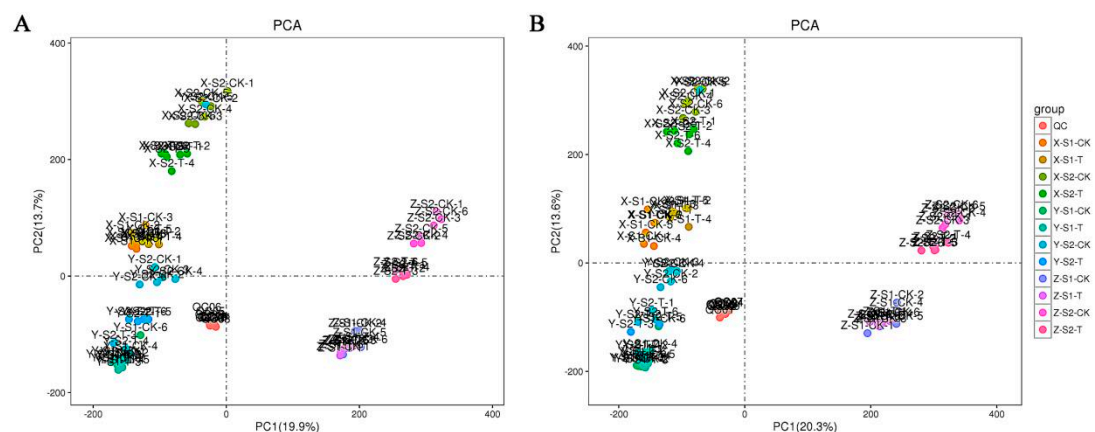

Fig. S5 Principal component analysis (PCA) of metabolome sample relationship. Figures A and B represent the principal component analysis of the sample relationship in the determination of cation and anion channels, respectively.

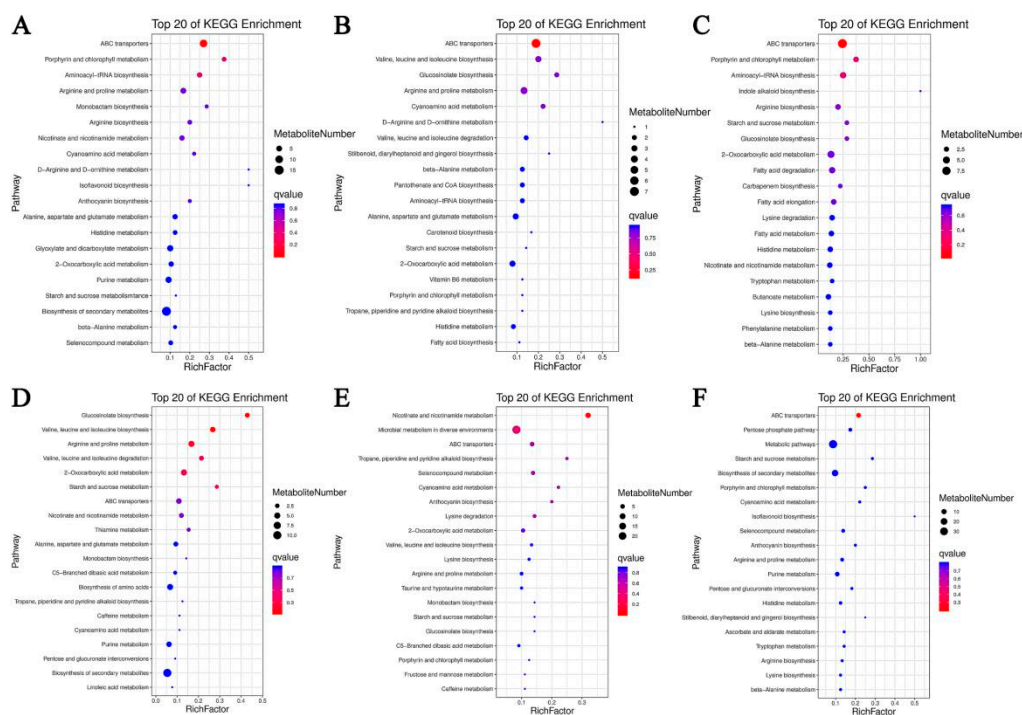

Fig. S6 The first 20 metabolic pathways obtained by KEGG enrichment analysis. A, B, & C. The first 20 metabolic pathways enriched by DAMs of sweetpotato cultivars Y25, Z13 and X27 during the growth stage S1. D, E, & F. The first 20 metabolic pathways enriched by the DAMs obtained from three sweetpotato cultivars Y25, Z13 and X27 during the growth stage S2, respectively.



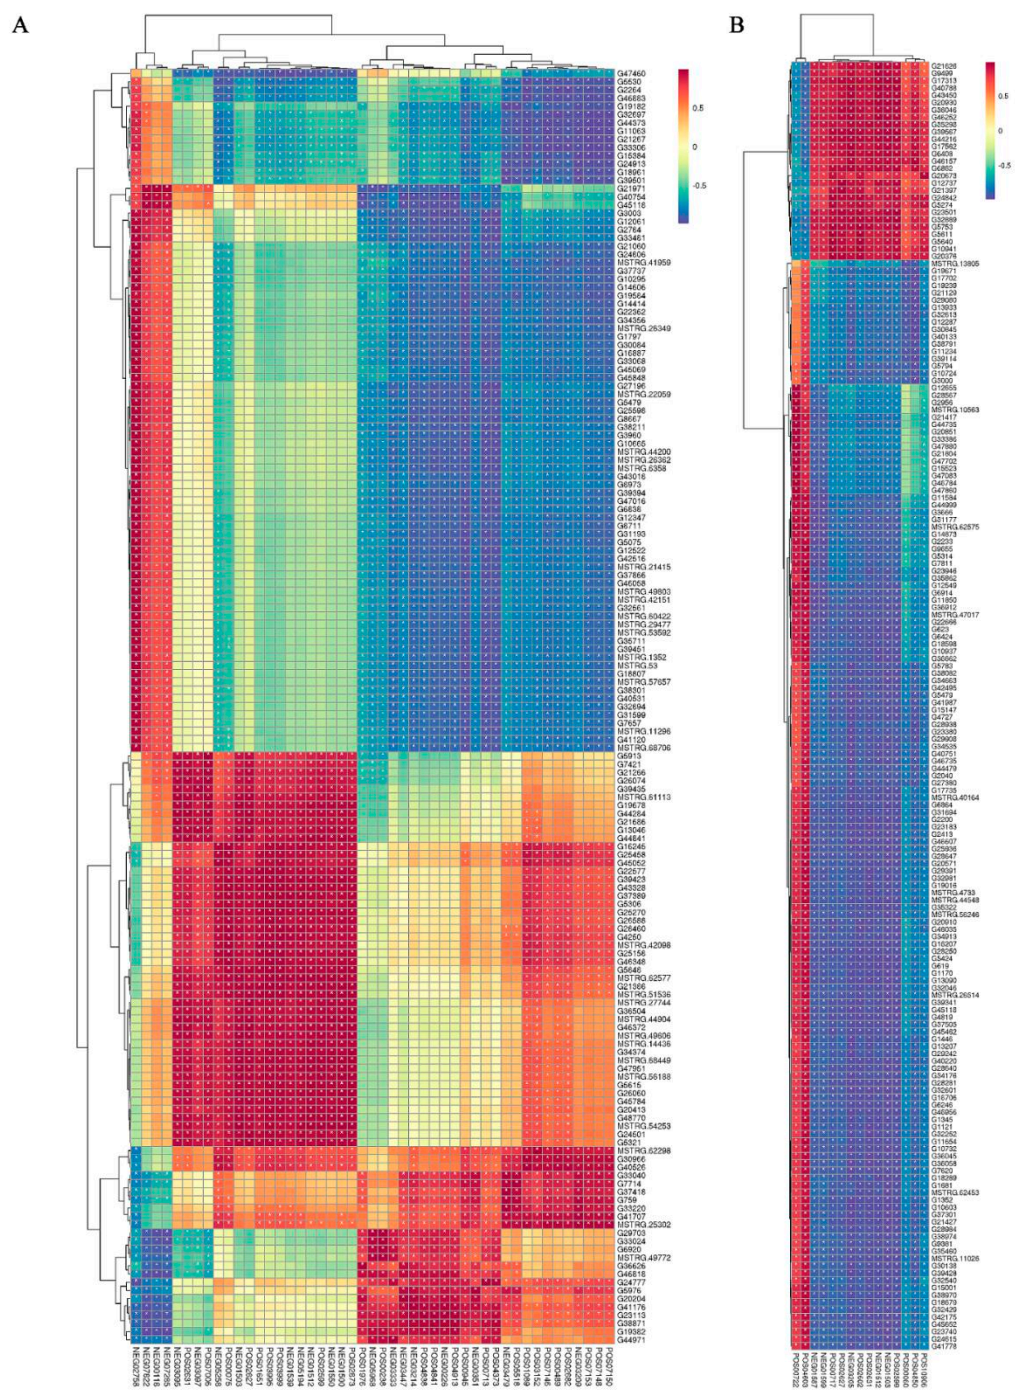

Fig. S7 Correlation analysis of between DEGs related to sugar metabolism and DEMs Figures A and B represent the correlation analysis of between DEGs related to sugar metabolism and DAMs in S1 and S2 periods, respectively.

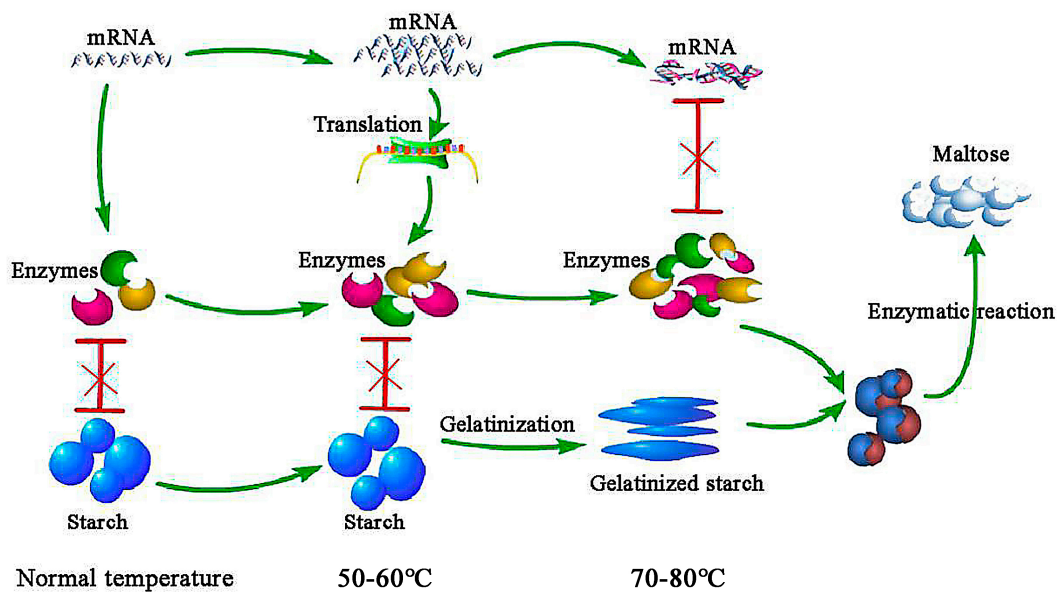

Fig. S8 Schematic diagram of saccharification process of sweetpotato storage root at high temperature

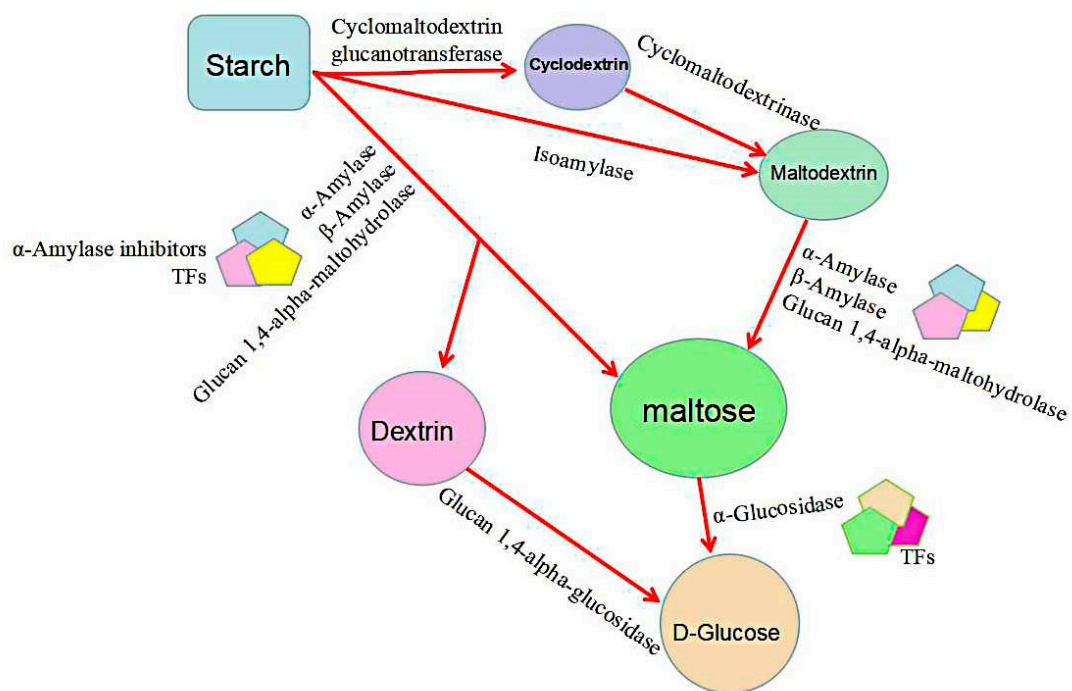

Fig. S9 Schematic diagram of key enzymes and regulatory factors in maltose synthesis pathway



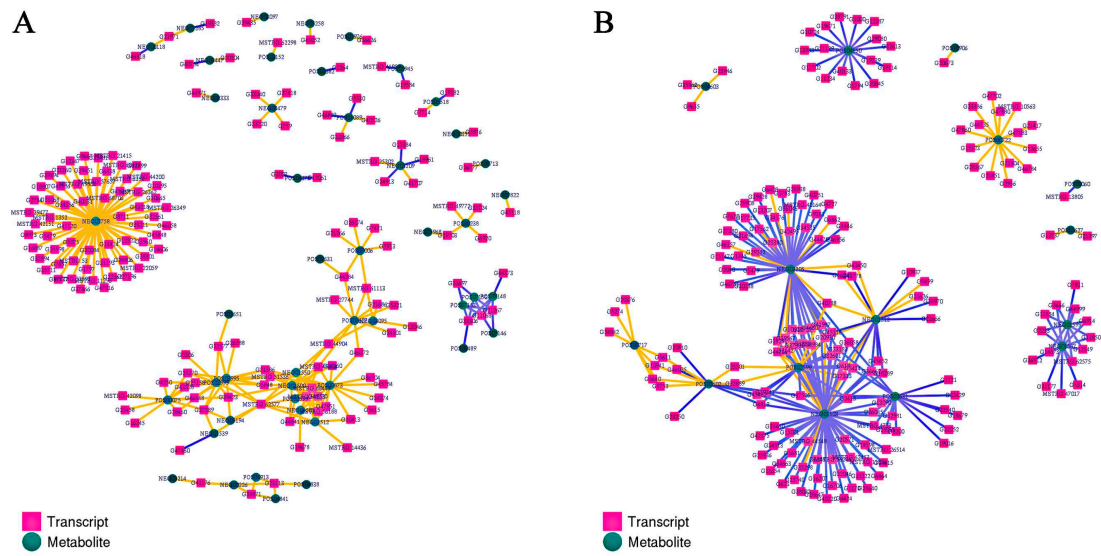

Fig. S10 Network analysis of DEGs and DAMs A&B. Network association of DEGs and DAMs in S1 and S2, respectively.

Table S1 qRT-PCR primers for validation experiment

| Unigenes code | Direction | Sequence (5'→3')     | Length |
|---------------|-----------|----------------------|--------|
| JX177359      | Forward   | CTTTGCCAAGAAGGAGATGC | 20     |
|               | Reverse   | TCTTGTCTGACCACCAACA  | 20     |
| G25158        | Forward   | AGCAGCAAGGTGGATGGTAC | 20     |
|               | Reverse   | GCCTTTATCCCTTTGCCGTG | 20     |
| G15055        | Forward   | GGTTGGACCACTCCATACGG | 20     |
|               | Reverse   | GTGTTGTAGTAGCCTGCGGT | 20     |
| G6471         | Forward   | CACTGAACAAGCTTGGCCAC | 20     |
|               | Reverse   | AGCCAATCTTCAGCCACCTC | 20     |
| G18261        | Forward   | AGCCAAGCTGTGACTCACAA | 20     |
|               | Reverse   | AGTCCACCAGTTTTGCACCA | 20     |
| G28456        | Forward   | CGAGTAAGAGCGGCGGATAA | 20     |
|               | Reverse   | AAACTGCCGTCCCCATCTTT | 20     |
| G35317        | Forward   | TGGTATGCCTGGACTTTGCC | 20     |
|               | Reverse   | CTGGTCATGGCTCTCTGCAT | 20     |
| G18147        | Forward   | GCTTTGAAACAAGCGACCGT | 20     |
|               | Reverse   | TGAAGCAGAATGGGCTGGAG | 20     |
| G39183        | Forward   | GTGCCCTGGGGAATGTACAA | 20     |
|               | Reverse   | CGCGTGGTAGCCTATCACAT | 20     |
| G11136        | Forward   | GGAATGTGAATGGGGAGGCA | 20     |
|               | Reverse   | ACCAATAGGGCATTGCAGCT | 20     |

Table S2 Base quality analysis    RawData(bp):total number of bases in RawData; BF: number of bases before filter; AF: number of bases after filter; Q20 (%): the number of bases whose sequencing base quality value reached above Q20 level and its percentage in RawData (or CleanData); Q30 (%): the number of bases whose sequencing base quality value reached above Q30 level and the percentage in RawData (or CleanData); N (%): the number of N bases in single-ended read and the percentage of N bases in RawData (or CleanData); GC (%): the proportion of sequence base GC before and after filter.

| Sample    | RawData(bp) | BF Q20(%)           | BF Q30(%)           | BF N(%)         | BF GC(%)            | CleanData(bp) | AF Q20(%)           | AF Q30(%)           | AF N(%)        | AF GC(%)            |
|-----------|-------------|---------------------|---------------------|-----------------|---------------------|---------------|---------------------|---------------------|----------------|---------------------|
| X-S1-CK-1 | 7610918100  | 7407503216 (97.33%) | 7067060620 (92.85%) | 1041233 (0.01%) | 3709323843 (48.74%) | 7561040017    | 7364480762 (97.40%) | 7027842665 (92.95%) | 251745 (0.00%) | 3683642830 (48.72%) |
| X-S1-CK-2 | 5807200500  | 5655435792 (97.39%) | 5399497459 (92.98%) | 805481 (0.01%)  | 2840924722 (48.92%) | 5759430164    | 5613261201 (97.46%) | 5360745306 (93.08%) | 192765 (0.00%) | 2815907983 (48.89%) |
| X-S1-CK-3 | 6207518700  | 6038579949 (97.28%) | 5756814466 (92.74%) | 849571 (0.01%)  | 3019575670 (48.64%) | 6164845320    | 6001803471 (97.36%) | 5723280817 (92.84%) | 204350 (0.00%) | 2997872069 (48.63%) |
| Y-S1-CK-1 | 7003012200  | 6815195296 (97.32%) | 6500291470 (92.82%) | 970026 (0.01%)  | 3475345086 (49.63%) | 6949785161    | 6768509323 (97.39%) | 6457462164 (92.92%) | 231534 (0.00%) | 3448308793 (49.62%) |
| Y-S1-CK-2 | 6071342400  | 5916801350 (97.45%) | 5649130194 (93.05%) | 819647 (0.01%)  | 3081962554 (50.76%) | 6017928519    | 5868869388 (97.52%) | 5604836069 (93.14%) | 199087 (0.00%) | 3054694891 (50.76%) |
| Y-S1-CK-3 | 6221026800  | 6051547341 (97.28%) | 5770066131 (92.75%) | 852212 (0.01%)  | 3081046427 (49.53%) | 6177888192    | 6014021306 (97.35%) | 5735757475 (92.84%) | 205446 (0.00%) | 3059548297 (49.52%) |
| Z-S1-CK-1 | 5970907200  | 5810272216 (97.31%) | 5541570250 (92.81%) | 817321 (0.01%)  | 2965985436 (49.67%) | 5927376898    | 5772131024 (97.38%) | 5506574023 (92.90%) | 196574 (0.00%) | 2943962466 (49.67%) |
| Z-S1-CK-2 | 5845753500  | 5690034417 (97.34%) | 5428805491 (92.87%) | 803356 (0.01%)  | 2916003877 (49.88%) | 5803579311    | 5653231979 (97.41%) | 5395158096 (92.96%) | 194317 (0.00%) | 2894461638 (49.87%) |
| Z-S1-CK-3 | 6515297700  | 6344084107 (97.37%) | 6054200231 (92.92%) | 892981 (0.01%)  | 3227980855 (49.54%) | 6473460369    | 6307693683 (97.44%) | 6020894322 (93.01%) | 216962 (0.00%) | 3206754811 (49.54%) |
| X-S1-T-1  | 5836394400  | 5670814667 (97.16%) | 5398117848 (92.49%) | 774754 (0.01%)  | 2893286961 (49.57%) | 5776400479    | 5618551630 (97.27%) | 5350447053 (92.63%) | 185417 (0.00%) | 2862500089 (49.56%) |
| X-S1-T-2  | 6586307400  | 6407600512 (97.29%) | 6107272565 (92.73%) | 870105 (0.01%)  | 3237912341 (49.16%) | 6530711667    | 6359632068 (97.38%) | 6063564864 (92.85%) | 209485 (0.00%) | 3209633725 (49.15%) |
| X-S1-T-3  | 7519417500  | 7296477686 (97.04%) | 6934104787 (92.22%) | 1002412 (0.01%) | 3679766412 (48.94%) | 7463597140    | 7249905946 (97.14%) | 6892289464 (92.35%) | 239225 (0.00%) | 3651331787 (48.92%) |
| Y-S1-T-1  | 7476331800  | 7332187392 (98.07%) | 7050493573 (94.30%) | 301610 (0.00%)  | 3728583210 (49.87%) | 7438327544    | 7299513405 (98.13%) | 7020751920 (94.39%) | 228443 (0.00%) | 3708901708 (49.86%) |
| Y-S1-T-2  | 6070548300  | 5931180178 (97.70%) | 5674253786 (93.47%) | 31753 (0.00%)   | 2997670218 (49.38%) | 6042680923    | 5908024137 (97.77%) | 5653352412 (93.56%) | 26061 (0.00%)  | 2983234682 (49.37%) |
| Y-S1-T-3  | 6296399700  | 6110981409 (97.06%) | 5719911612 (90.84%) | 49525 (0.00%)   | 3152418982 (50.07%) | 6257910308    | 6077452293 (97.12%) | 5690236205 (90.93%) | 46990 (0.00%)  | 3132368504 (50.05%) |
| Z-S1-T-1  | 6257887800  | 6099568918 (97.47%) | 5820551007 (93.01%) | 45952 (0.00%)   | 3131086224 (50.03%) | 6223117755    | 6070093324 (97.54%) | 5793762865 (93.10%) | 31133 (0.00%)  | 3112944723 (50.02%) |
| Z-S1-T-2  | 5589707400  | 5444811408 (97.41%) | 5190133490 (92.85%) | 37096 (0.00%)   | 2773649703 (49.62%) | 5543929727    | 5404658991 (97.49%) | 5153255304 (92.95%) | 26622 (0.00%)  | 2749739518 (49.60%) |

|           |            |                     |                     |                 |                     |            |                     |                     |                |                     |
|-----------|------------|---------------------|---------------------|-----------------|---------------------|------------|---------------------|---------------------|----------------|---------------------|
| Z-S1-T-3  | 7016900700 | 6846495927 (97.57%) | 6540970515 (93.22%) | 51848 (0.00%)   | 3480046099 (49.60%) | 6965902974 | 6801990302 (97.65%) | 6500151073 (93.31%) | 35739 (0.00%)  | 3453261072 (49.57%) |
| X-S2-CK-1 | 6684673500 | 6540346735 (97.84%) | 6265391288 (93.73%) | 35682 (0.00%)   | 3216052059 (48.11%) | 6640689450 | 6501305233 (97.90%) | 6229296532 (93.80%) | 29366 (0.00%)  | 3192627416 (48.08%) |
| X-S2-CK-2 | 7946695800 | 7728993548 (97.26%) | 7368329947 (92.72%) | 1081619 (0.01%) | 3812182339 (47.97%) | 7875596407 | 7666439690 (97.34%) | 7311018279 (92.83%) | 260091 (0.00%) | 3775267530 (47.94%) |
| X-S2-CK-3 | 7885152900 | 7675596835 (97.34%) | 7323674413 (92.88%) | 1089492 (0.01%) | 3758886792 (47.67%) | 7835630954 | 7633075179 (97.41%) | 7284986365 (92.97%) | 260938 (0.00%) | 3733632117 (47.65%) |
| Y-S2-CK-1 | 6403725600 | 6241708488 (97.47%) | 5961194113 (93.09%) | 873393 (0.01%)  | 3149557489 (49.18%) | 6346626731 | 6190533746 (97.54%) | 5913974996 (93.18%) | 211671 (0.00%) | 3119979732 (49.16%) |
| Y-S2-CK-2 | 6197925300 | 6026762955 (97.24%) | 5745152607 (92.69%) | 850321 (0.01%)  | 2974951069 (48.00%) | 6152423142 | 5987360079 (97.32%) | 5709253859 (92.80%) | 206669 (0.00%) | 2951958114 (47.98%) |
| Y-S2-CK-3 | 6937801200 | 6751984488 (97.32%) | 6441682623 (92.85%) | 957830 (0.01%)  | 3345178165 (48.22%) | 6890383150 | 6710854245 (97.39%) | 6404113770 (92.94%) | 228524 (0.00%) | 3320922591 (48.20%) |
| Z-S2-CK-1 | 6214231200 | 6046046074 (97.29%) | 5767193577 (92.81%) | 855214 (0.01%)  | 3074681579 (49.48%) | 6162787472 | 6000883579 (97.37%) | 5725893011 (92.91%) | 204605 (0.00%) | 3047993494 (49.46%) |
| Z-S2-CK-2 | 7606427700 | 7401306824 (97.30%) | 7059200875 (92.81%) | 1040146 (0.01%) | 3782784987 (49.73%) | 7545687506 | 7347854038 (97.38%) | 7010208190 (92.90%) | 252178 (0.00%) | 3751310586 (49.71%) |
| Z-S2-CK-3 | 6858388500 | 6678670374 (97.38%) | 6373821928 (92.93%) | 942275 (0.01%)  | 3366331403 (49.08%) | 6816398455 | 6642358036 (97.45%) | 6340686523 (93.02%) | 226256 (0.00%) | 3344791278 (49.07%) |
| X-S2-T-1  | 7636551000 | 7441856494 (97.45%) | 7113835525 (93.16%) | 1051007 (0.01%) | 3732443644 (48.88%) | 7590492113 | 7403045653 (97.53%) | 7078717078 (93.26%) | 253402 (0.00%) | 3709062727 (48.86%) |
| X-S2-T-2  | 7222588200 | 7041683831 (97.50%) | 6707906521 (92.87%) | 127589 (0.00%)  | 3545327649 (49.09%) | 7175306627 | 7000857482 (97.57%) | 6670960496 (92.97%) | 122534 (0.00%) | 3520494342 (49.06%) |
| X-S2-T-3  | 7141719900 | 6964895400 (97.52%) | 6637259650 (92.94%) | 125765 (0.00%)  | 3509878802 (49.15%) | 7101324089 | 6930468315 (97.59%) | 6606185276 (93.03%) | 121045 (0.00%) | 3488791631 (49.13%) |
| Y-S2-T-1  | 8054530500 | 7841039022 (97.35%) | 7457358667 (92.59%) | 142230 (0.00%)  | 3970262666 (49.29%) | 7996637461 | 7791709977 (97.44%) | 7412995893 (92.70%) | 137148 (0.00%) | 3939557268 (49.27%) |
| Y-S2-T-2  | 6424294200 | 6233938200 (97.04%) | 5929058010 (92.29%) | 867012 (0.01%)  | 3198345124 (49.79%) | 6372981983 | 6189922770 (97.13%) | 5889149266 (92.41%) | 209965 (0.00%) | 3172050895 (49.77%) |
| Y-S2-T-3  | 6594369900 | 6416669949 (97.31%) | 6124409159 (92.87%) | 907313 (0.01%)  | 3258438981 (49.41%) | 6544501891 | 6373793572 (97.39%) | 6085402194 (92.98%) | 218134 (0.00%) | 3233270069 (49.40%) |
| Z-S2-T-1  | 5958458400 | 5797595440 (97.30%) | 5529162197 (92.80%) | 810059 (0.01%)  | 2962949022 (49.73%) | 5907843848 | 5753262789 (97.38%) | 5488610499 (92.90%) | 196763 (0.00%) | 2936755835 (49.71%) |
| Z-S2-T-2  | 5947571100 | 5797283967 (97.47%) | 5532850320 (93.03%) | 48290 (0.00%)   | 2926783501 (49.21%) | 5914263005 | 5769483966 (97.55%) | 5507763000 (93.13%) | 32885 (0.00%)  | 2909073007 (49.19%) |
| Z-S2-T-3  | 6352116600 | 6176348558 (97.23%) | 5888747501 (92.71%) | 869197 (0.01%)  | 3116717250 (49.07%) | 6313032591 | 6143927094 (97.32%) | 5859620270 (92.82%) | 208288 (0.00%) | 3096725986 (49.05%) |

Table S3 Statistical results of transcriptome data comparison with reference genomes Total mean the number of reads after ribosome filtration. Unmapped (%) was the number of reads in the unmapped reference genome and its proportion to the effective reads. Unique Mapped (%) referred to the number of reads that were unique to the reference genome and its proportion to the effective reads. Multiple Mapped indicated the number of reads and the proportion of effective reads in multiple sites were mentioned. All mapped was the total number of reads that could be mapped to the genome and its proportion to effective reads.

| Sample    | Total    | Unmapped(%)       | Unique Mapped(%)  | Multiple Mapped(%) | Total Mapped(%)   |
|-----------|----------|-------------------|-------------------|--------------------|-------------------|
| X-S1-CK-1 | 48964534 | 10733731 (21.92%) | 35368786 (72.23%) | 2862017 (5.85%)    | 38230803 (78.08%) |
| X-S1-CK-2 | 37491818 | 8185758 (21.83%)  | 27101306 (72.29%) | 2204754 (5.88%)    | 29306060 (78.17%) |
| X-S1-CK-3 | 39678692 | 8732217 (22.01%)  | 28658845 (72.23%) | 2287630 (5.77%)    | 30946475 (77.99%) |
| Y-S1-CK-1 | 44851494 | 9881497 (22.03%)  | 32467337 (72.39%) | 2502660 (5.58%)    | 34969997 (77.97%) |
| Y-S1-CK-2 | 38610270 | 7991925 (20.70%)  | 28466833 (73.73%) | 2151512 (5.57%)    | 30618345 (79.30%) |
| Y-S1-CK-3 | 40032432 | 8841134 (22.08%)  | 28952660 (72.32%) | 2238638 (5.59%)    | 31191298 (77.92%) |
| Z-S1-CK-1 | 37798756 | 8183226 (21.65%)  | 27551501 (72.89%) | 2064029 (5.46%)    | 29615530 (78.35%) |
| Z-S1-CK-2 | 36616972 | 7857557 (21.46%)  | 26754009 (73.06%) | 2005406 (5.48%)    | 28759415 (78.54%) |
| Z-S1-CK-3 | 42114464 | 9054793 (21.50%)  | 30685697 (72.86%) | 2373974 (5.64%)    | 33059671 (78.50%) |
| X-S1-T-1  | 36016772 | 7172984 (19.92%)  | 26898765 (74.68%) | 1945023 (5.40%)    | 28843788 (80.08%) |
| X-S1-T-2  | 42446252 | 8471942 (19.96%)  | 31686699 (74.65%) | 2287611 (5.39%)    | 33974310 (80.04%) |
| X-S1-T-3  | 48540634 | 9868647 (20.33%)  | 36135607 (74.44%) | 2536380 (5.23%)    | 38671987 (79.67%) |
| Y-S1-T-1  | 48074710 | 9341555 (19.43%)  | 36259465 (75.42%) | 2473690 (5.15%)    | 38733155 (80.57%) |
| Y-S1-T-2  | 39045976 | 7790835 (19.95%)  | 29288891 (75.01%) | 1966250 (5.04%)    | 31255141 (80.05%) |
| Y-S1-T-3  | 39703064 | 7904863 (19.91%)  | 29780203 (75.01%) | 2017998 (5.08%)    | 31798201 (80.09%) |
| Z-S1-T-1  | 39953850 | 7990382 (20.00%)  | 29934744 (74.92%) | 2028724 (5.08%)    | 31963468 (80.00%) |
| Z-S1-T-2  | 36453814 | 7400264 (20.30%)  | 27176367 (74.55%) | 1877183 (5.15%)    | 29053550 (79.70%) |
| Z-S1-T-3  | 45528682 | 9187191 (20.18%)  | 33999004 (74.68%) | 2342487 (5.15%)    | 36341491 (79.82%) |
| X-S2-CK-1 | 42925098 | 9613822 (22.40%)  | 30768340 (71.68%) | 2542936 (5.92%)    | 33311276 (77.60%) |
| X-S2-CK-2 | 51281302 | 11848088 (23.10%) | 36346847 (70.88%) | 3086367 (6.02%)    | 39433214 (76.90%) |
| X-S2-CK-3 | 50586040 | 11685753 (23.10%) | 35952656 (71.07%) | 2947631 (5.83%)    | 38900287 (76.90%) |
| Y-S2-CK-1 | 40310790 | 8961983 (22.23%)  | 28966891 (71.86%) | 2381916 (5.91%)    | 31348807 (77.77%) |
| Y-S2-CK-2 | 39689620 | 9159664 (23.08%)  | 28268982 (71.23%) | 2260974 (5.70%)    | 30529956 (76.92%) |
| Y-S2-CK-3 | 44438894 | 10146304 (22.83%) | 31711621 (71.36%) | 2580969 (5.81%)    | 34292590 (77.17%) |
| Z-S2-CK-1 | 39908442 | 9006865 (22.57%)  | 28597497 (71.66%) | 2304080 (5.77%)    | 30901577 (77.43%) |



|           |          |                   |                   |                 |                   |
|-----------|----------|-------------------|-------------------|-----------------|-------------------|
| Z-S2-CK-2 | 47486636 | 10645559 (22.42%) | 34304665 (72.24%) | 2536412 (5.34%) | 36841077 (77.58%) |
| Z-S2-CK-3 | 44123820 | 10090763 (22.87%) | 31533848 (71.47%) | 2499209 (5.66%) | 34033057 (77.13%) |
| X-S2-T-1  | 48604980 | 9882995 (20.33%)  | 36045972 (74.16%) | 2676013 (5.51%) | 38721985 (79.67%) |
| X-S2-T-2  | 47241160 | 9342982 (19.78%)  | 35307876 (74.74%) | 2590302 (5.48%) | 37898178 (80.22%) |
| X-S2-T-3  | 46215982 | 9112225 (19.72%)  | 34612274 (74.89%) | 2491483 (5.39%) | 37103757 (80.28%) |
| Y-S2-T-1  | 52023688 | 10300875 (19.80%) | 38867042 (74.71%) | 2855771 (5.49%) | 41722813 (80.20%) |
| Y-S2-T-2  | 41518226 | 9018813 (21.72%)  | 30337179 (73.07%) | 2162234 (5.21%) | 32499413 (78.28%) |
| Y-S2-T-3  | 42705172 | 9232173 (21.62%)  | 31306521 (73.31%) | 2166478 (5.07%) | 33472999 (78.38%) |
| Z-S2-T-1  | 38682032 | 8276552 (21.40%)  | 28380695 (73.37%) | 2024785 (5.23%) | 30405480 (78.60%) |
| Z-S2-T-2  | 37907810 | 7646090 (20.17%)  | 28178162 (74.33%) | 2083558 (5.50%) | 30261720 (79.83%) |
| Z-S2-T-3  | 40172152 | 8239373 (20.51%)  | 29747233 (74.05%) | 2185546 (5.44%) | 31932779 (79.49%) |

---

Table S4 Information of the metabolic pathways co-enriched in the two growth stages

| ID      | S1     |           | S2     |           | Description                           |
|---------|--------|-----------|--------|-----------|---------------------------------------|
|         | Number | P value   | Number | P value   |                                       |
| ko00500 | 31     | 0.0000363 | 17     | 0.0302272 | Starch and sucrose metabolism         |
| ko01110 | 139    | 0.0004274 | 95     | 0.0212630 | Biosynthesis of secondary metabolites |
| ko04075 | 27     | 0.0066951 | 23     | 0.0018027 | Plant hormone signal transduction     |
| ko00052 | 11     | 0.0078751 | 9      | 0.0077552 | Galactose metabolism                  |
| ko00950 | 7      | 0.0202774 | 9      | 0.0001740 | Isoquinoline alkaloid biosynthesis    |
| ko00905 | 5      | 0.0652108 | 5      | 0.0206491 | Brassinosteroid biosynthesis          |
